# Supplementary material for: Toxicity reduction of imidazolium-based ionic liquids by the oxygenation of the alkyl substituent
Source: Royal Society of Chemistry journal article supplement (doi:10.1039/c6ra16182k), 2016-01-01
Supplement: c6ra16182k1.pdf [file c6ra16182k1.pdf]

Electronic Supporting Information

**Toxicity reduction of imidazolium-based ionic liquids by the oxygenation of the alkyl substituent**

M. Vraneš,<sup>a</sup> A. Tot,<sup>a</sup> S. Jovanović-Šanta,<sup>a</sup> M. Karaman,<sup>b</sup> S. Dožić,<sup>a</sup> K. Tešanović,<sup>b</sup> V. Kojić<sup>c</sup>  
and S. Gadžurić<sup>a</sup>

AT04, D2O

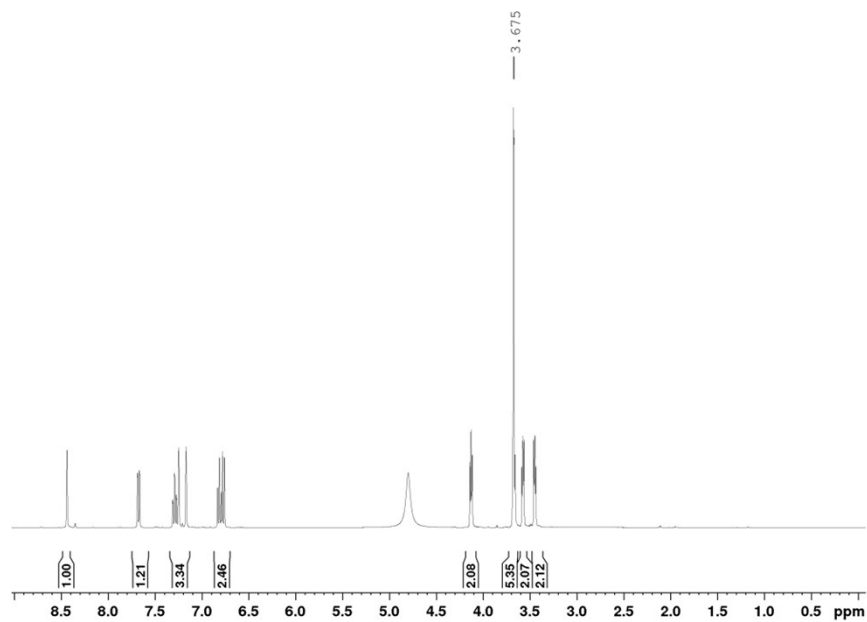

AT04, D2O

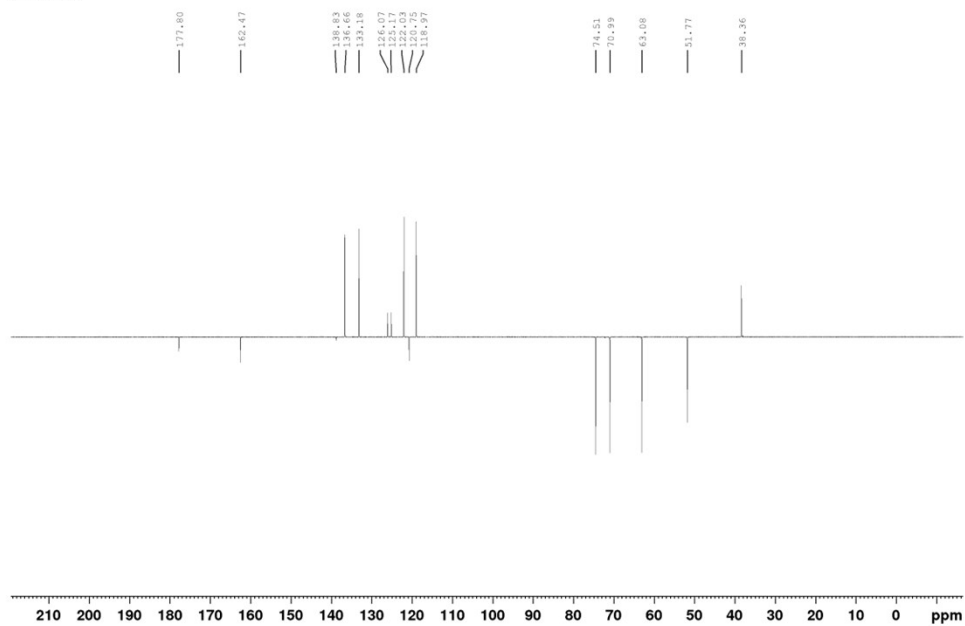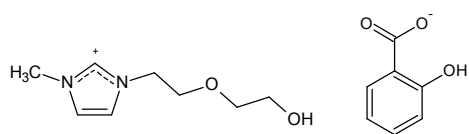

Figure S1a.  $^1\text{H}$  and  $^{13}\text{C}$  NMR spectra of  $[\text{OHC}_2\text{OC}_2\text{mIm}][\text{Sal}]$

AT13,D2O.10.11.15.

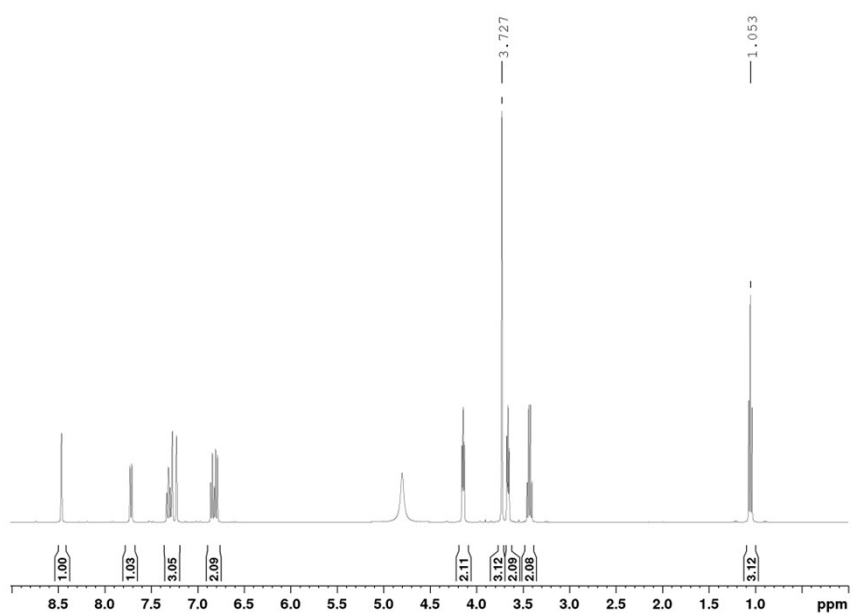

AT13,D2O.10.11.15.

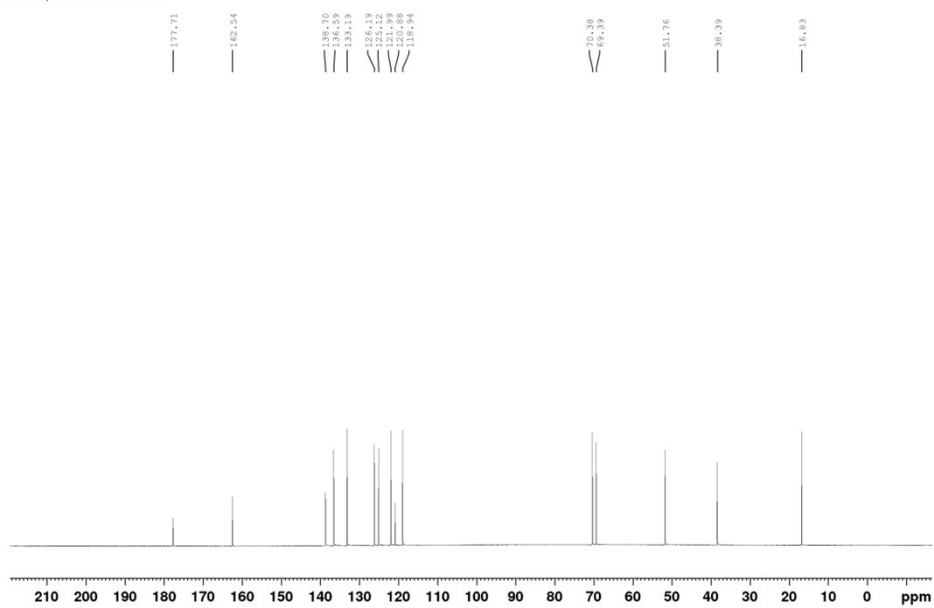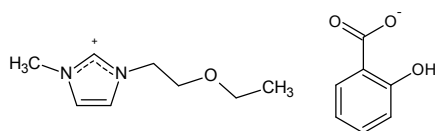

Figure S1b. <sup>1</sup>H and <sup>13</sup>C NMR spectra of [C<sub>2</sub>OC<sub>2</sub>mIm][Sal]

AT12,D2O.8.11.15.

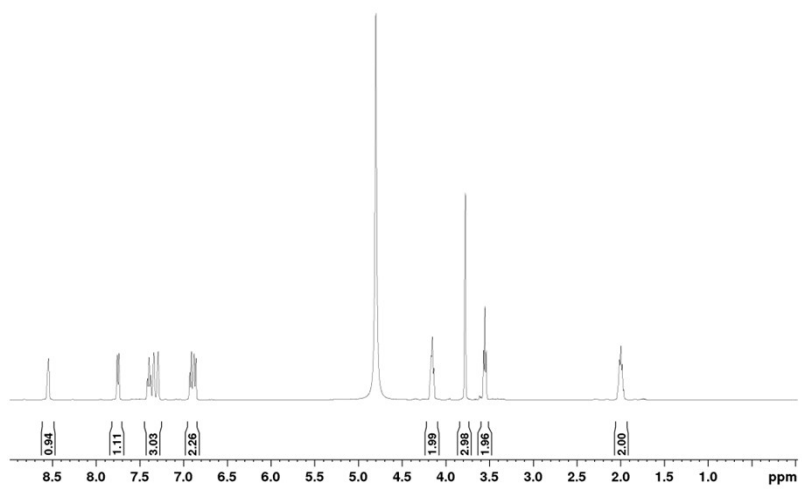

AT12,D2O.8.11.15.

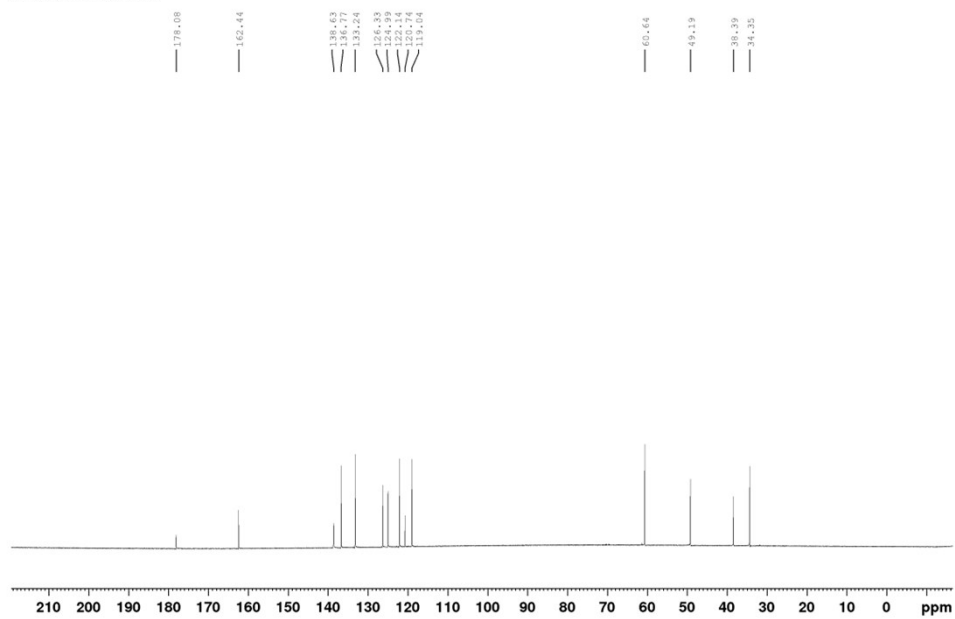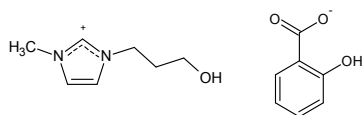

Figure S1c. <sup>1</sup>H and <sup>13</sup>C NMR spectra of [OHC<sub>3</sub>mIm][Sal]

AT16, D2O.18.11.15.

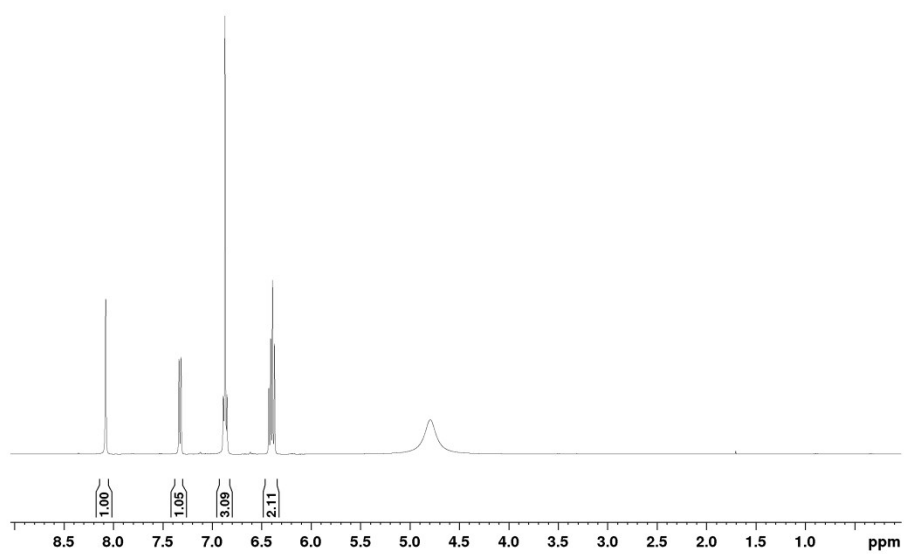

AT16, D2O.18.11.15.

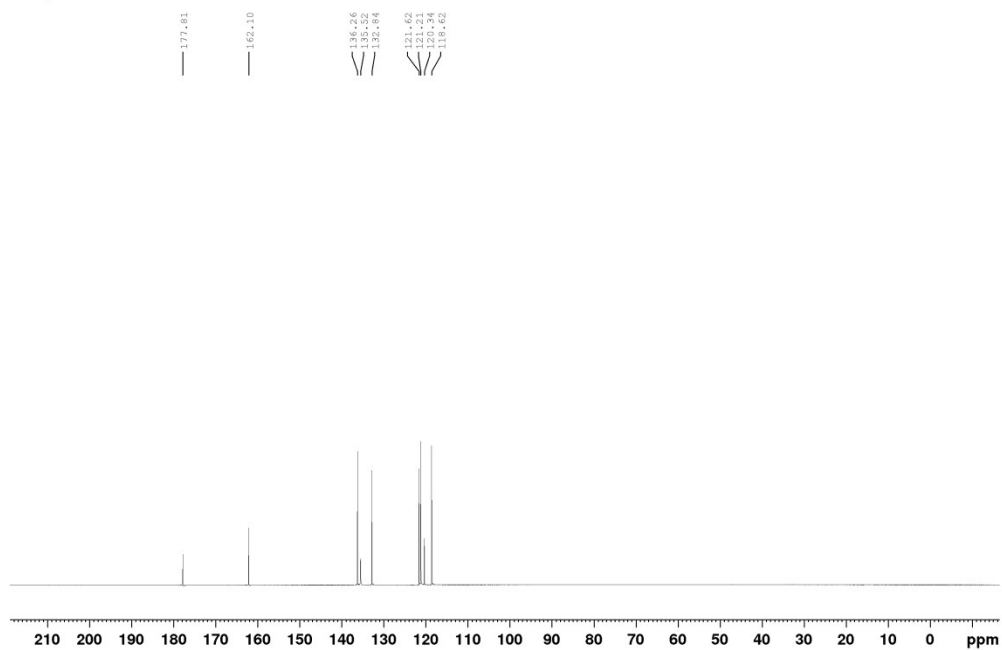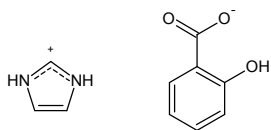

Figure S1d.  $^1\text{H}$  and  $^{13}\text{C}$  NMR spectra of  $[\text{Im}][\text{Sal}]$

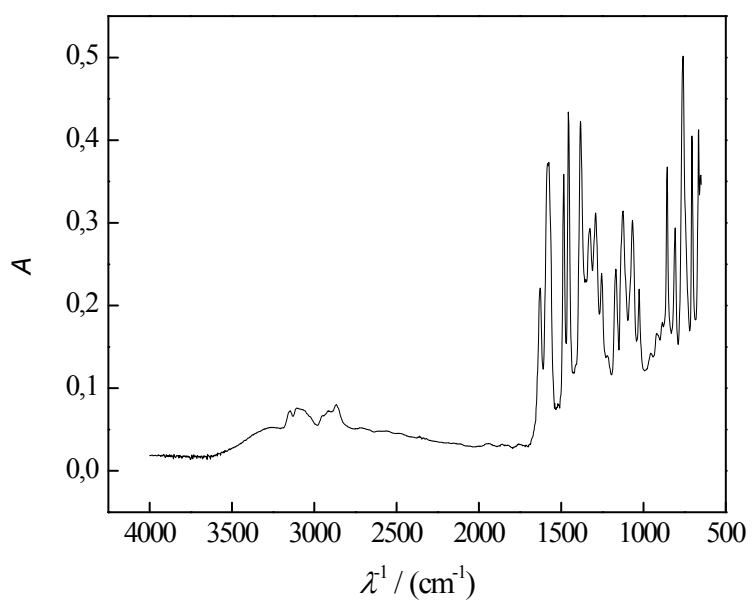

Figure S2a. IR spectrum of  $[\text{OHC}_2\text{OC}_2\text{mIm}][\text{Sal}]$

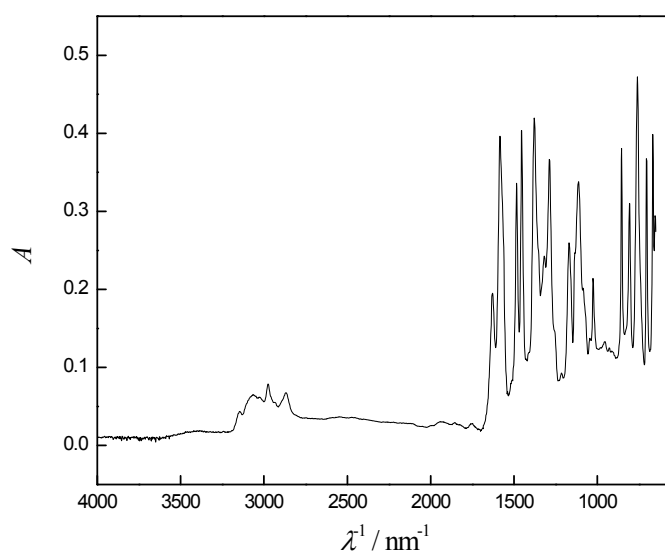

Figure S2b. IR spectrum of  $[\text{C}_2\text{OC}_2\text{mIm}][\text{Sal}]$

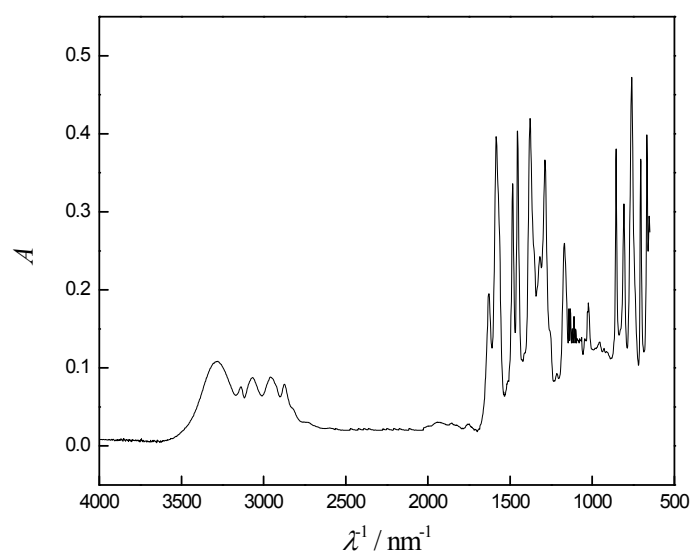

Figure S2c. IR spectrum of [OHC<sub>3</sub>mIm][Sal]

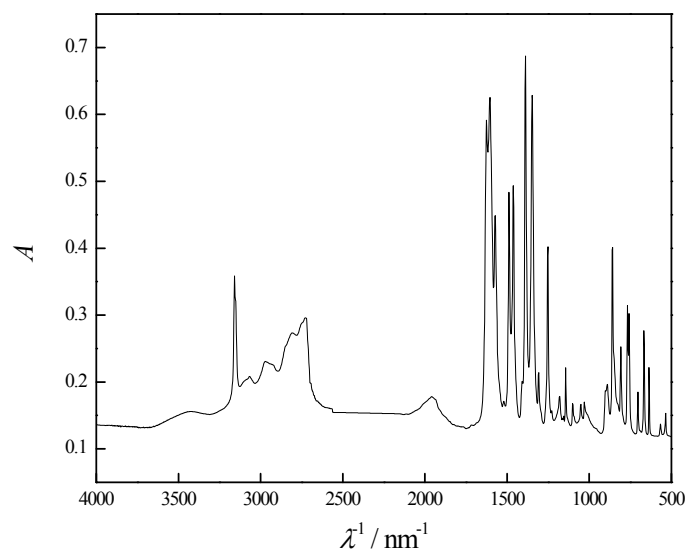

Figure S2d. IR spectrum of [Im][Sal]
